# Supplementary material
Source: publisher figshare collection journal article supplement (https://acs.figshare.com/ndownloader/files/4079104)
Supplement: Supplementary file 1 [file 4079104]

## Supporting Information

### Identifying Molecular Species on Surfaces by Scanning Tunneling Microscopy: Methyl Pyruvate on Pd(111)

Michael Garvey<sup>1</sup>, Yun Bai<sup>1</sup>, J. Anibal Boscoboinik<sup>1,2</sup>, Luke Burkholder<sup>1</sup>, Thomas E. Sorensen<sup>1</sup> and Wilfred T. Tysoe<sup>1</sup> \*

<sup>1</sup> *Department of Chemistry and Laboratory for Surface Studies, University of Wisconsin-Milwaukee, Milwaukee, WI 53211, USA*

<sup>2</sup> *Fritz-Haber-Institut der Max-Planck-Gesellschaft, Faradayweg 4-6, 14195 Berlin, Germany*

E-mail: wtt@uwm.edu

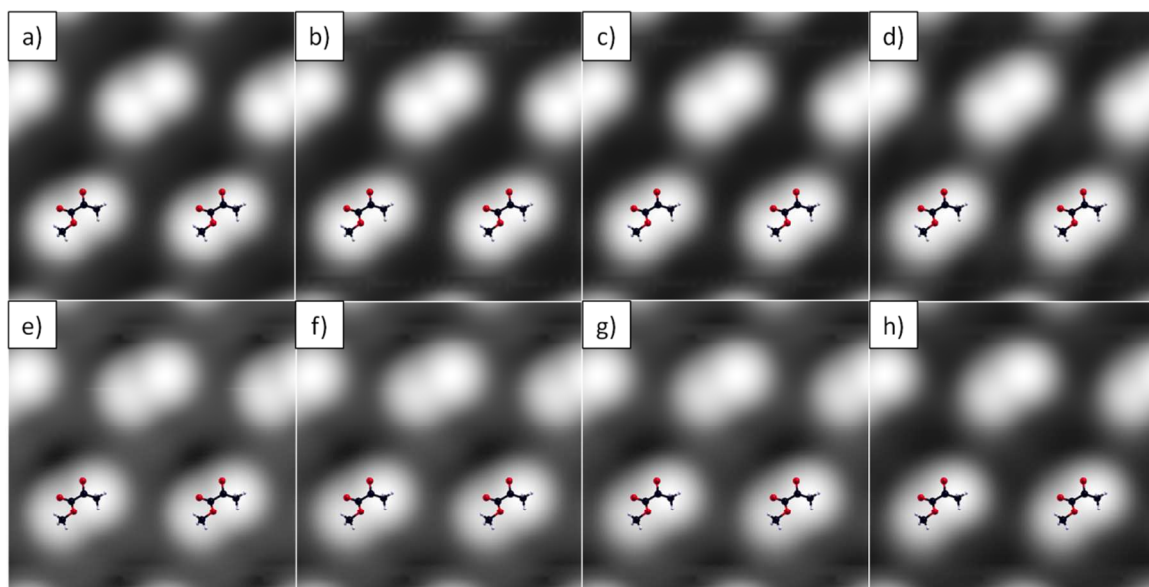

Figure S1: Simulated STM images of the most stable keto form of methyl pyruvate (A30 *cis*) imaged with Au on W(110) tip at varied bias: a) -0.1 V, b) -0.2 V, c) -0.3 V, d) -0.4 V e) +0.1 V, f) +0.2 V, g) +0.3 V, h) +0.4 V

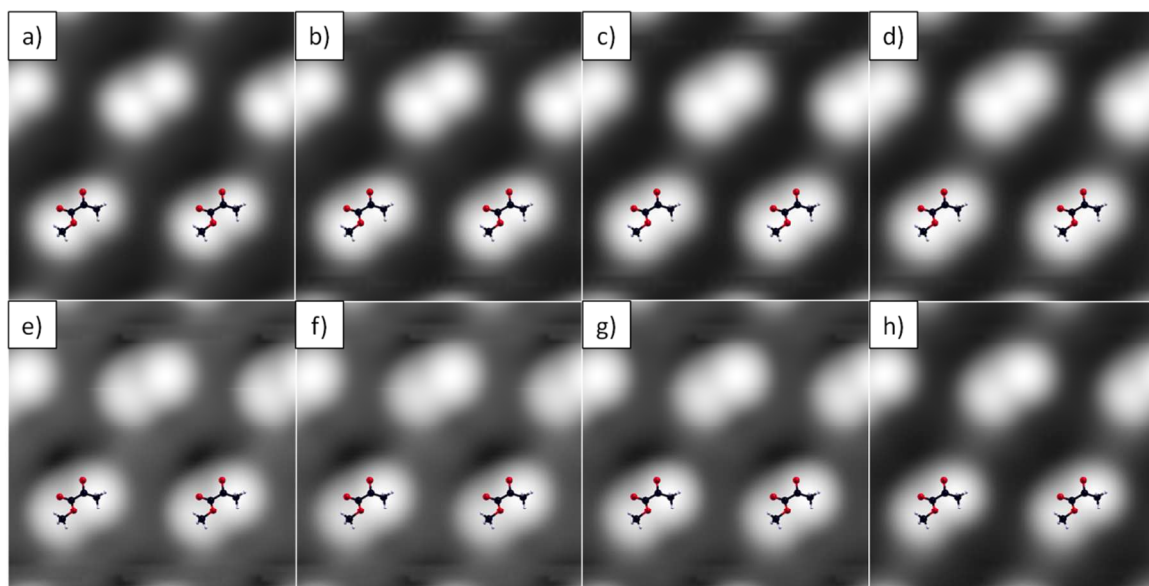

Figure S2: Simulated STM images of the most stable keto form of methyl pyruvate (A30 *cis*) imaged with a CH<sub>3</sub> group on Au on W(110) tip at varied bias: a) -0.1 V, b) -0.2 V, c) -0.3 V, d) -0.4 V e) +0.1 V, f) +0.2 V, g) +0.3 V, h) +0.4 V

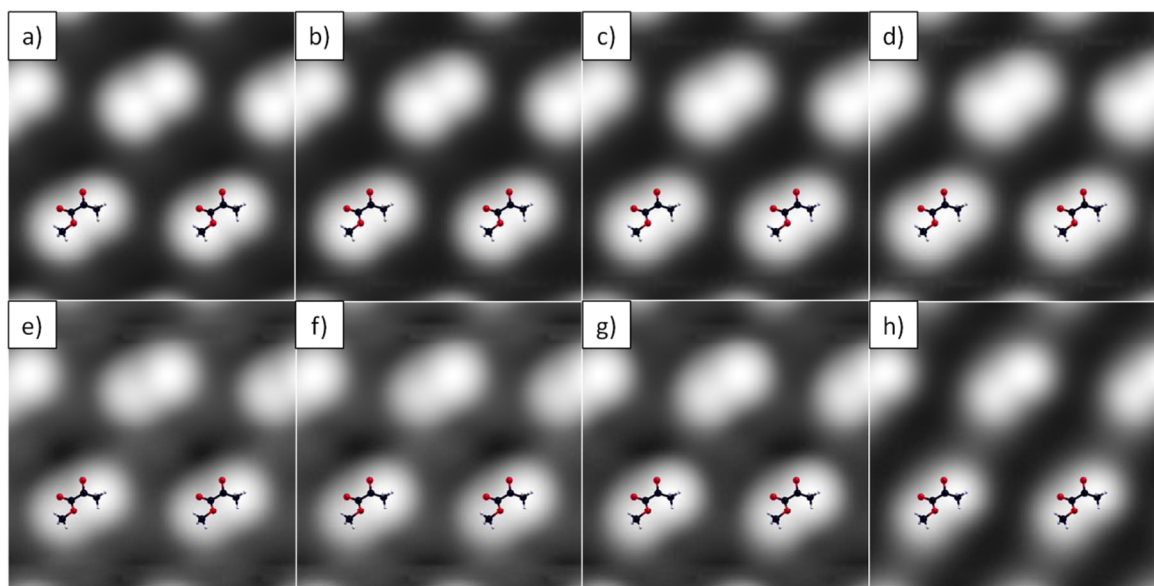

Figure S3: Simulated STM images of the most stable keto form of methyl pyruvate (A30 *cis*) imaged with a CO group Au on W(110) tip at varied bias: a) -0.1 V, b) -0.2 V, c) -0.3 V, d) -0.4 V e) +0.1 V, f) +0.2 V, g) +0.3 V, h) +0.4 V

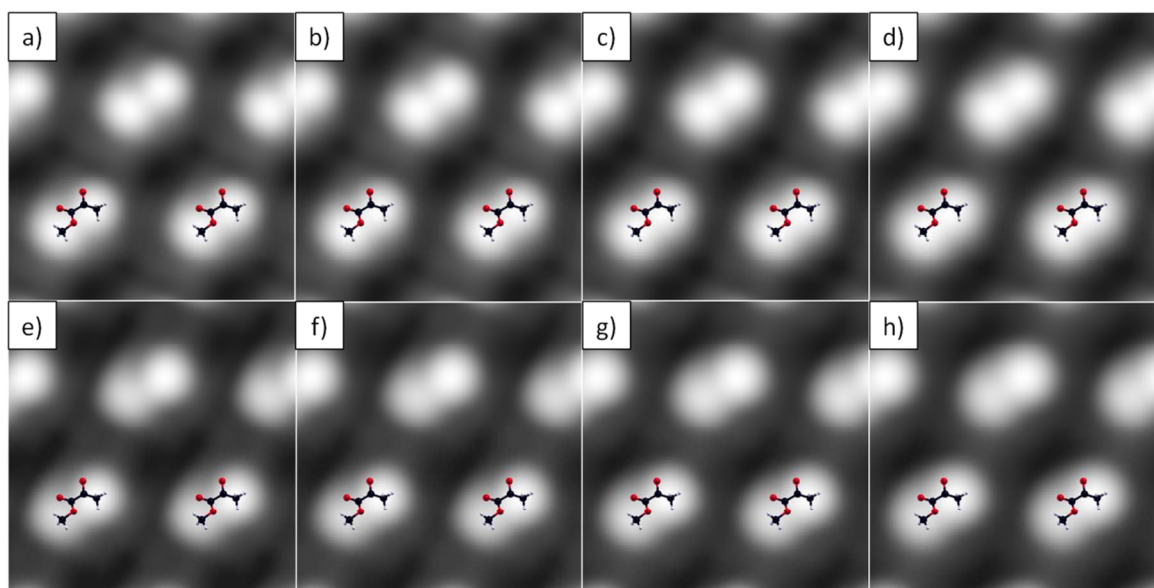

Figure S4: Simulated STM images of the most stable keto form of methyl pyruvate (A30 *cis*) imaged with Au on W(111) tip at varied bias: a) -0.1 V, b) -0.2 V, c) -0.3 V, d) -0.4 V e) +0.1 V, f) +0.2 V, g) +0.3 V, h) +0.4 V

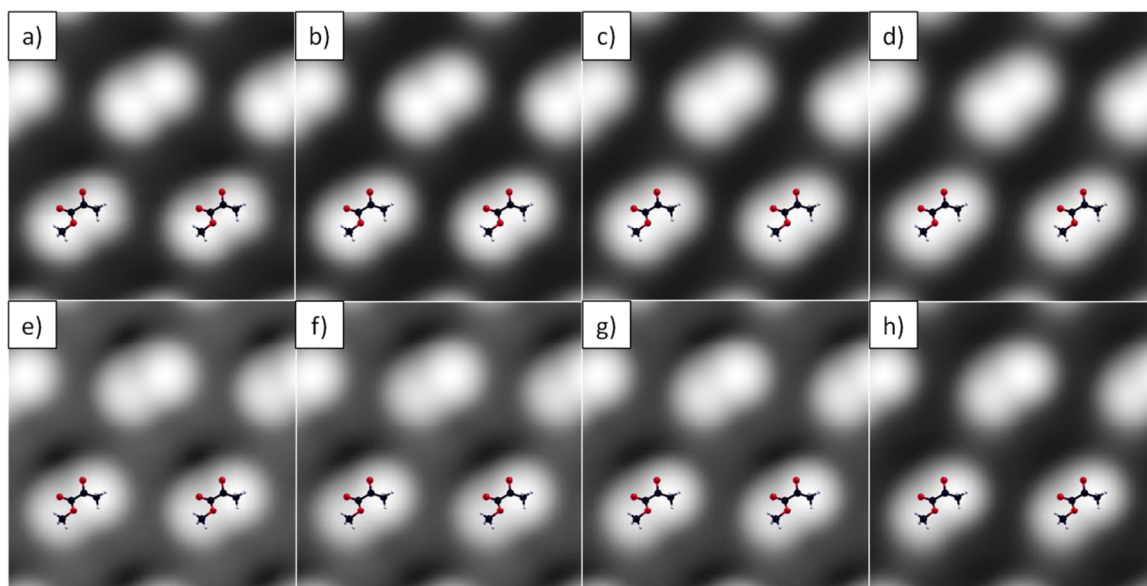

Figure S5: Simulated STM images of the most stable keto form of methyl pyruvate (A30 *cis*) imaged with a CH<sub>3</sub> group on Au on W(111) tip at varied bias: a) -0.1 V, b) -0.2 V, c) -0.3 V, d) -0.4 V e) +0.1 V, f) +0.2 V, g) +0.3 V, h) +0.4 V

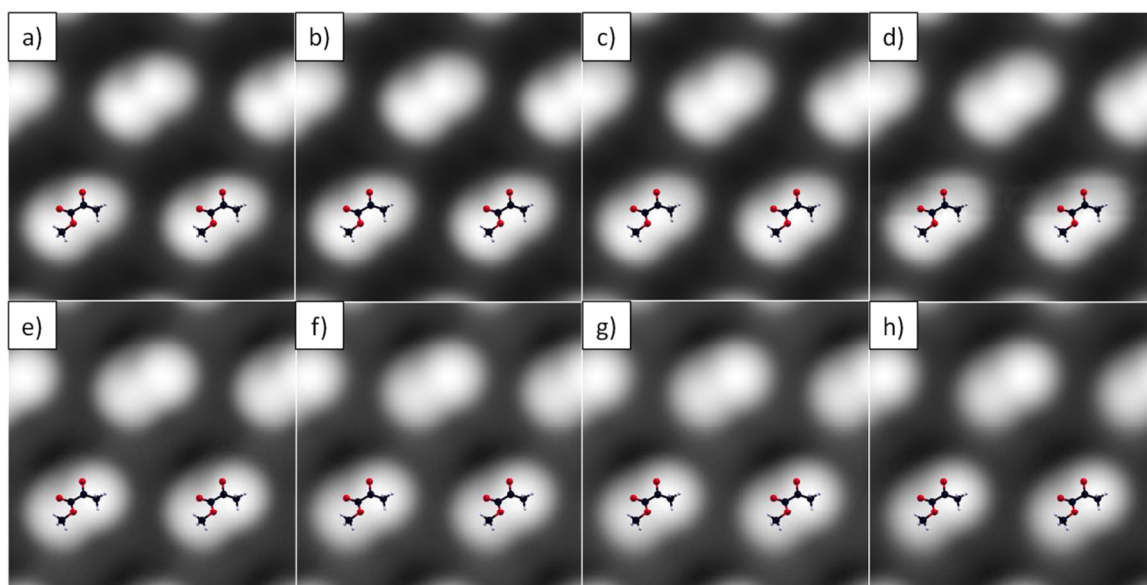

Figure S6: Simulated STM images of the most stable keto form of methyl pyruvate (A30 *cis*) imaged with a CO group on Au on W(111) tip at varied bias: a) -0.1 V, b) -0.2 V, c) -0.3 V, d) -0.4 V e) +0.1 V, f) +0.2 V, g) +0.3 V, h) +0.4 V

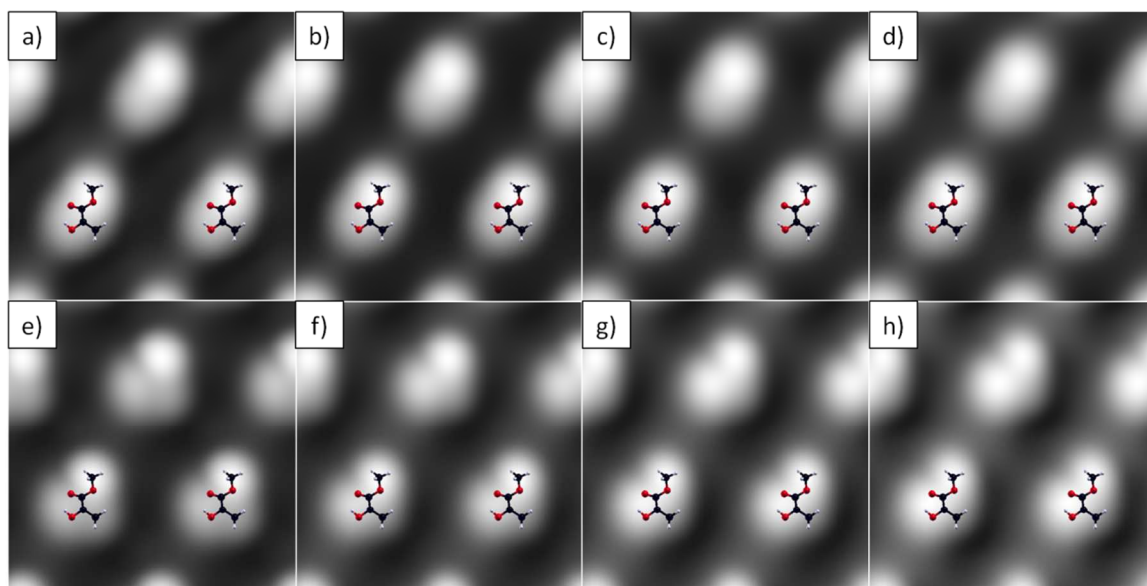

Figure S7: Simulated STM images of the most stable enol form of methyl pyruvate (AB *cis*) imaged with a Au on W(110) tip at varied bias: a) -0.1 V, b) -0.2 V, c) -0.3 V, d) -0.4 V e) +0.1 V, f) +0.2 V, g) +0.3 V, h) +0.4 V

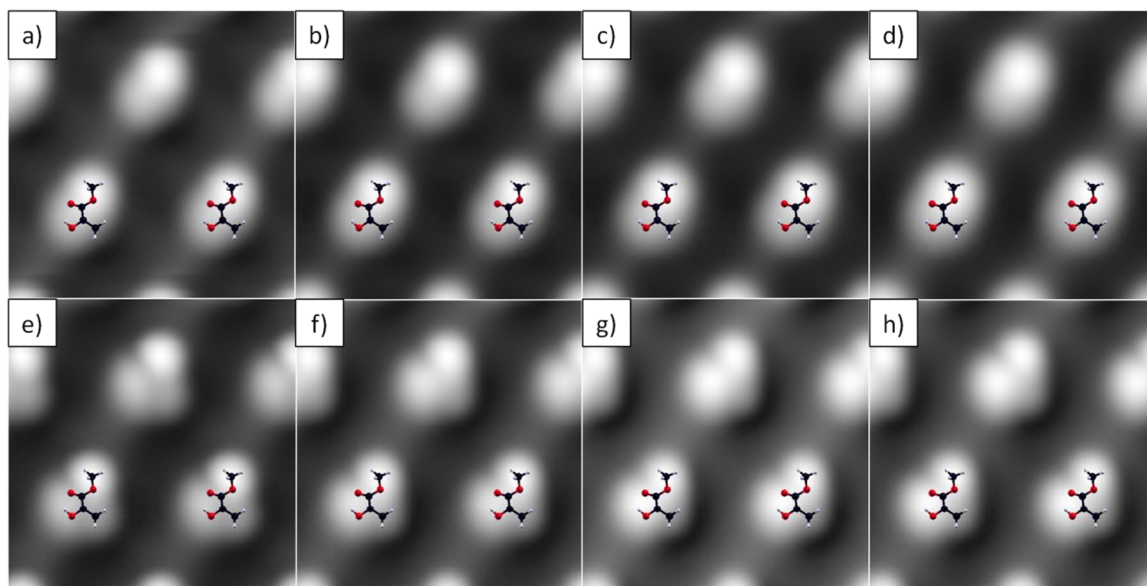

Figure S8: Simulated STM images of the most stable enol form of methyl pyruvate (AB *cis*) imaged with a CH<sub>3</sub> group on Au on W(110) tip at varied bias: a) -0.1 V, b) -0.2 V, c) -0.3 V, d) -0.4 V e) +0.1 V, f) +0.2 V, g) +0.3 V, h) +0.4 V



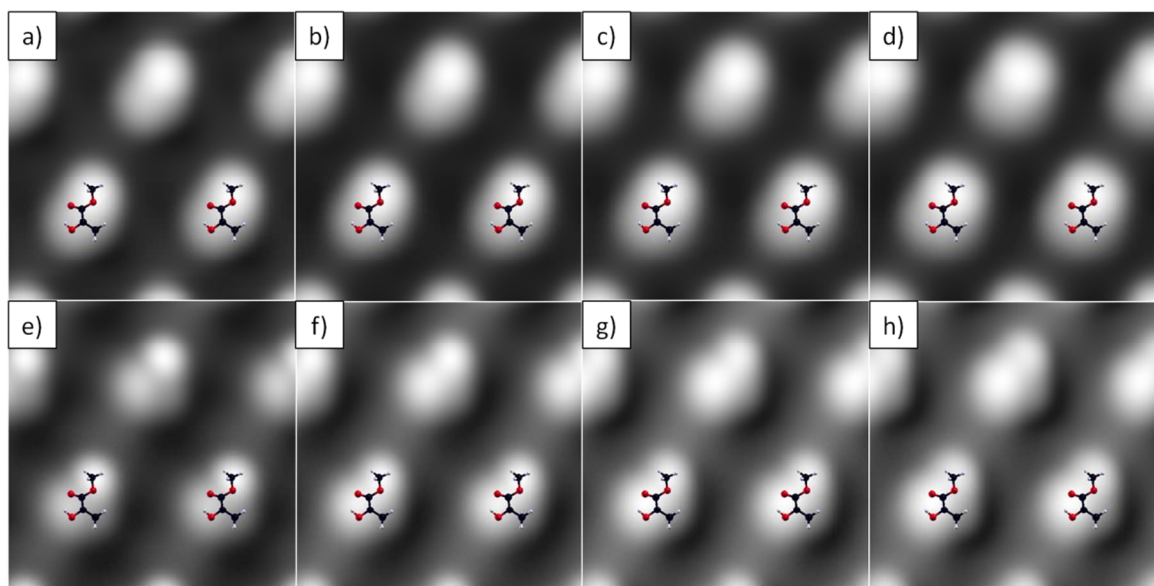

Figure S9: Simulated STM images of the most stable enol form of methyl pyruvate (AB *cis*) imaged with a CO group on Au on W(110) tip at varied bias: a) -0.1 V, b) -0.2 V, c) -0.3 V, d) -0.4 V e) +0.1 V, f) +0.2 V, g) +0.3 V, h) +0.4 V

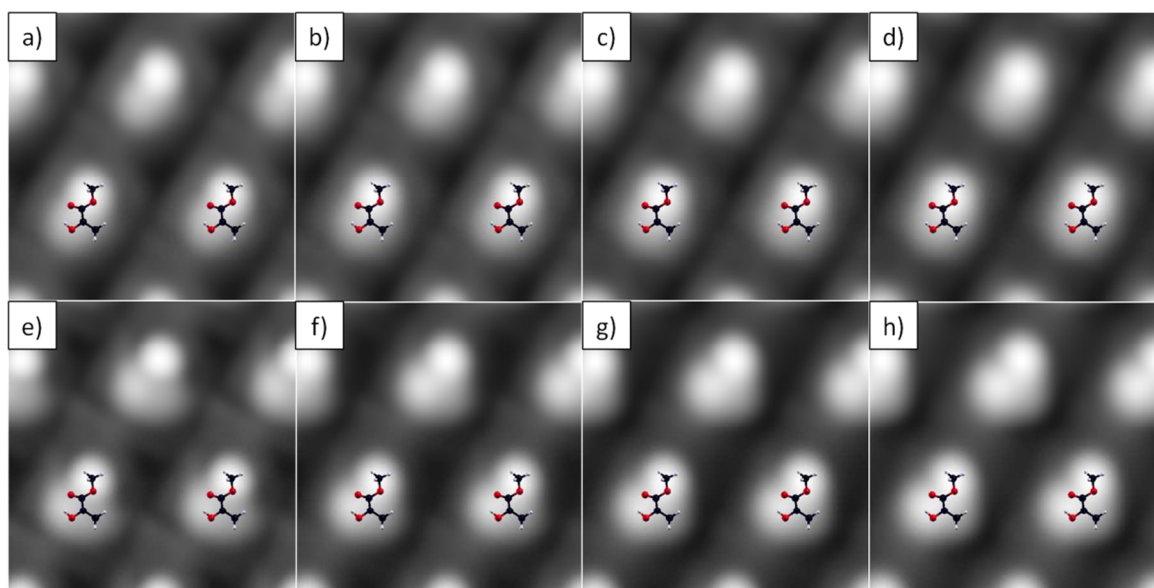

Figure S10: Simulated STM images of the most stable enol form of methyl pyruvate (AB *cis*) imaged with a Au on W(111) tip at varied bias: a) -0.1 V, b) -0.2 V, c) -0.3 V, d) -0.4 V e) +0.1 V, f) +0.2 V, g) +0.3 V, h) +0.4 V

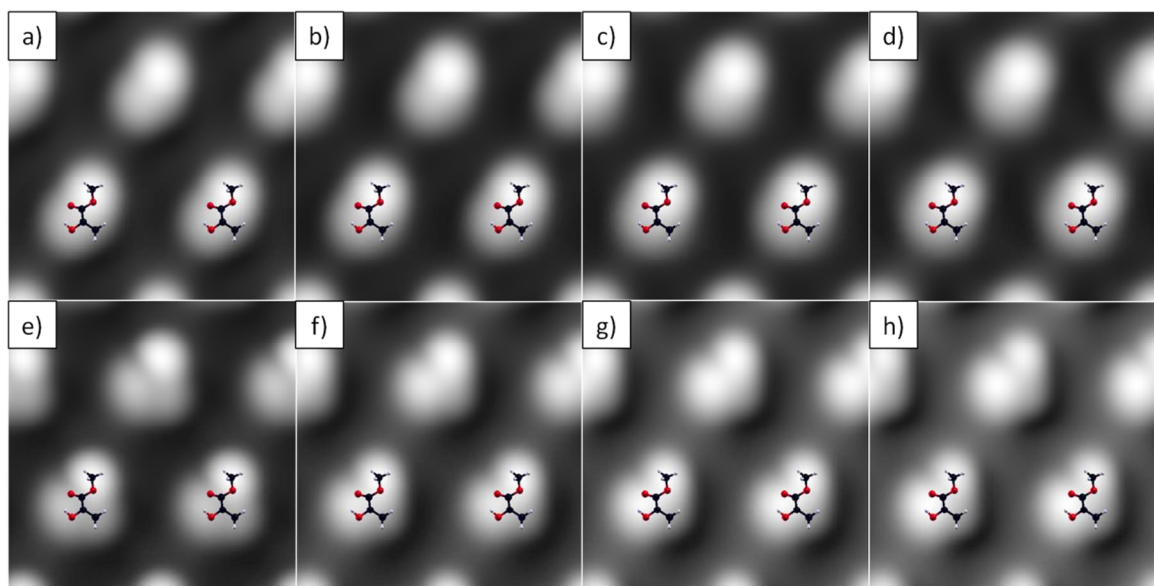

Figure S11: Simulated STM images of the most stable enol form of methyl pyruvate (AB *cis*) imaged with a CH<sub>3</sub> group on Au on W(111) tip at varied bias: a) -0.1 V, b) -0.2 V, c) -0.3 V, d) -0.4 V e) +0.1 V, f) +0.2 V, g) +0.3 V, h) +0.4 V

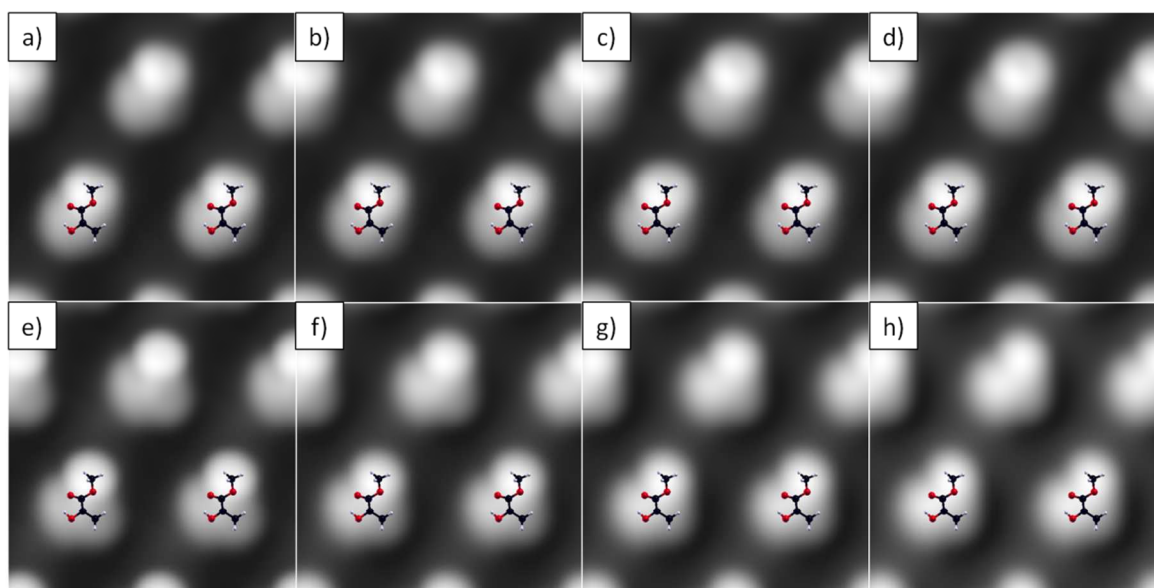

Figure S12: Simulated STM images of the most stable enol form of methyl pyruvate (AB *cis*) imaged with a CO group on Au on W(111) tip at varied bias: a) -0.1 V, b) -0.2 V, c) -0.3 V, d) -0.4 V e) +0.1 V, f) +0.2 V, g) +0.3 V, h) +0.4 V

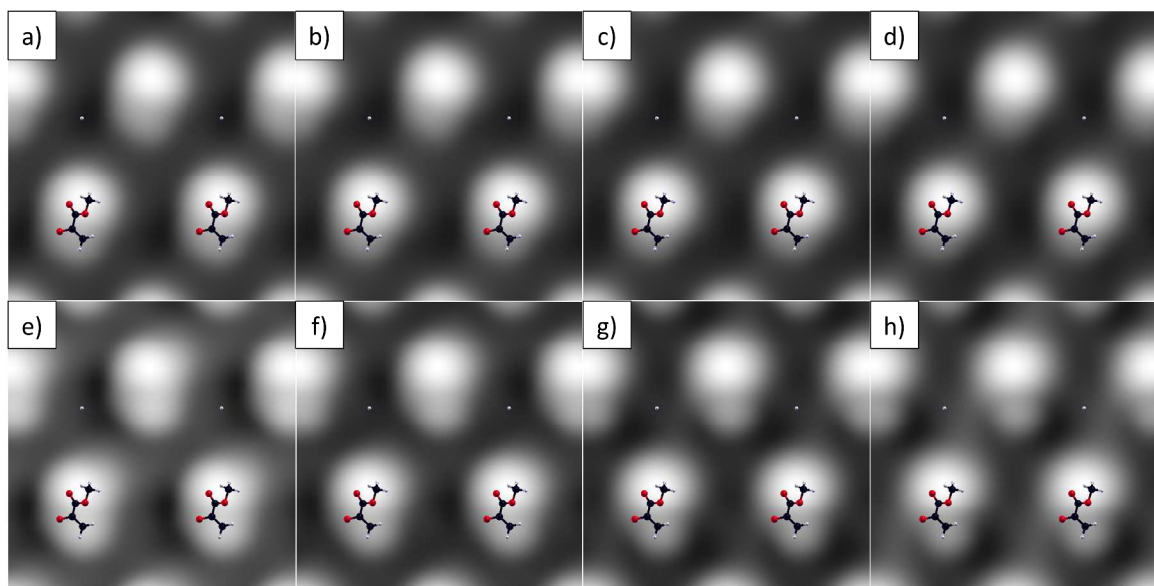

Figure S13: Simulated STM images of the most stable enolate form of methyl pyruvate (BA *cis*) imaged with a Au on W(110) tip at varied bias: a) -0.1 V, b) -0.2 V, c) -0.3 V, d) -0.4 V e) +0.1 V, f) +0.2 V, g) +0.3 V, h) +0.4 V

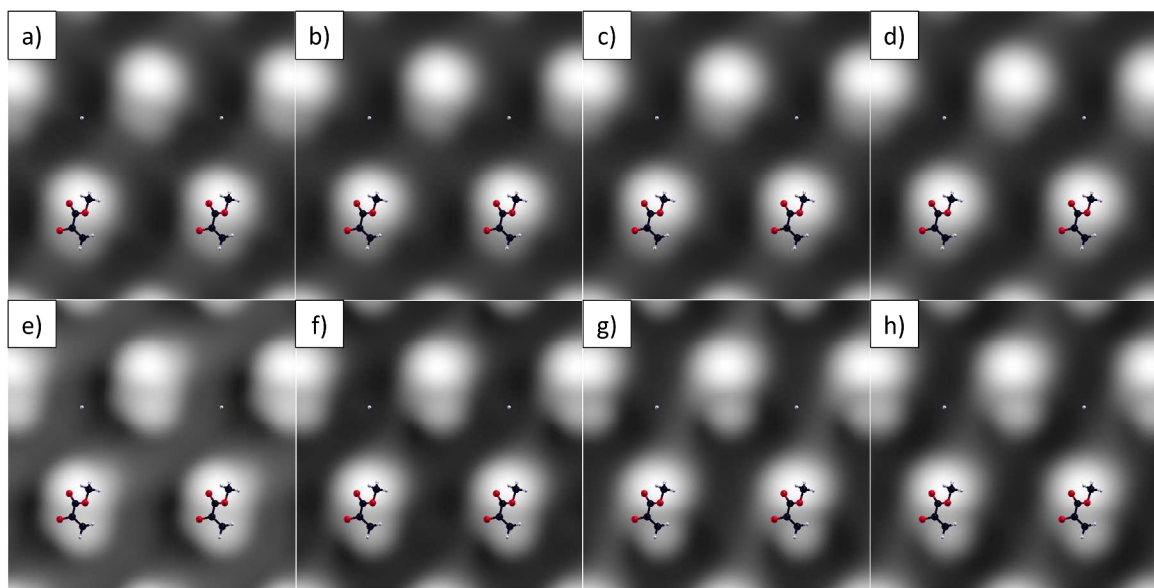

Figure S14: Simulated STM images of the most stable enolate form of methyl pyruvate (BA *cis*) imaged with a CH<sub>3</sub> group on Au on W(110) tip at varied bias: a) -0.1 V, b) -0.2 V, c) -0.3 V, d) -0.4 V e) +0.1 V, f) +0.2 V, g) +0.3 V, h) +0.4 V



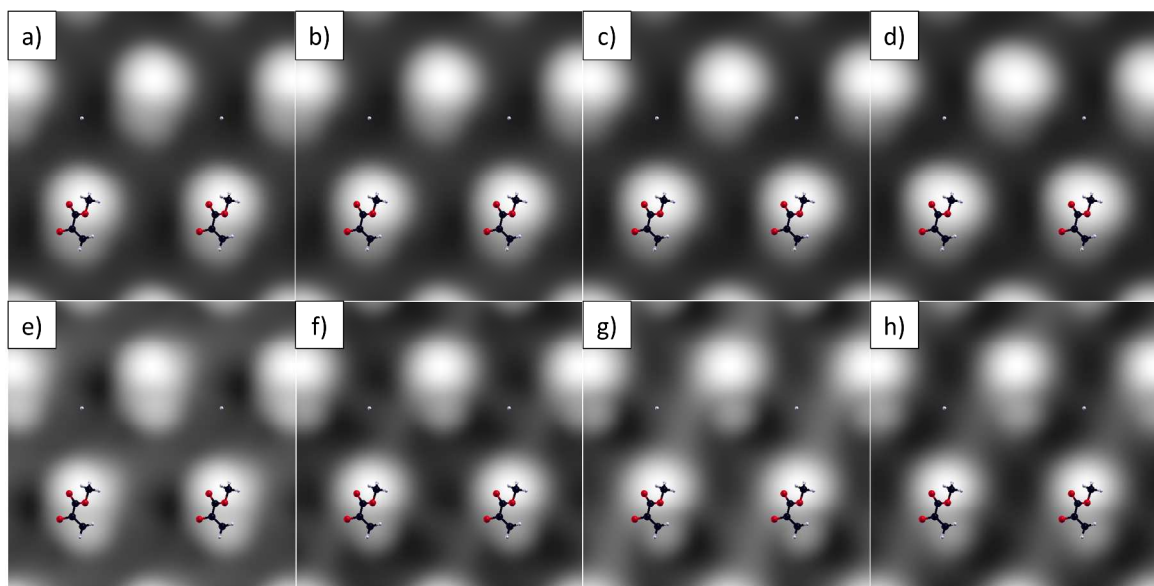

Figure S15: Simulated STM images of the most stable enolate form of methyl pyruvate (BA *cis*) imaged with a CO group on Au on W(110) tip at varied bias: a) -0.1 V, b) -0.2 V, c) -0.3 V, d) -0.4 V e) +0.1 V, f) +0.2 V, g) +0.3 V, h) +0.4 V

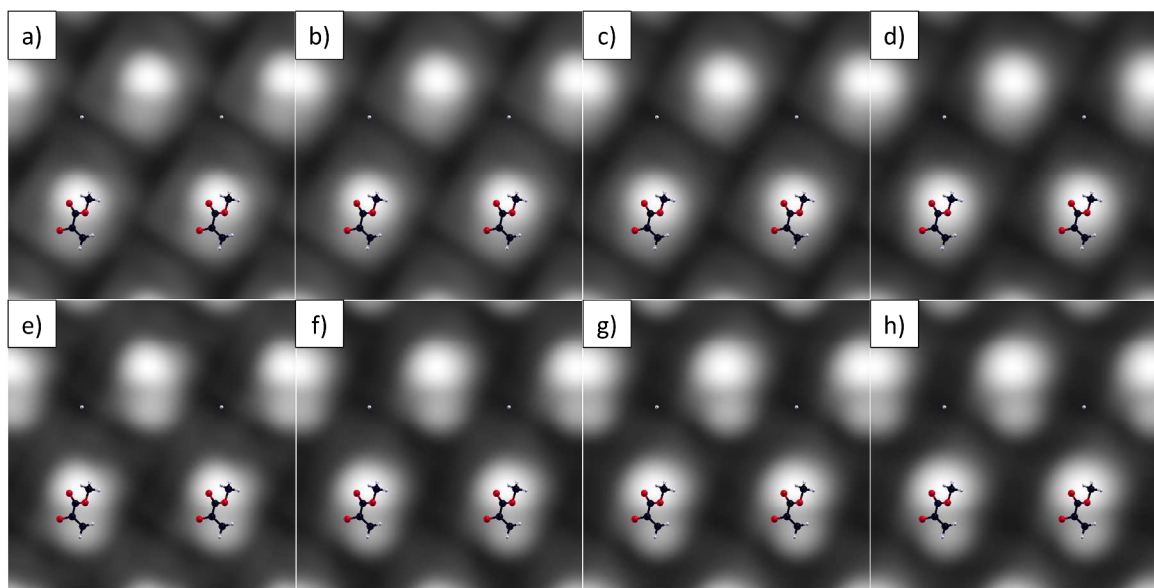

Figure S16: Simulated STM images of the most stable enolate form of methyl pyruvate (BA *cis*) imaged with a Au on W(111) tip at varied bias: a) -0.1 V, b) -0.2 V, c) -0.3 V, d) -0.4 V e) +0.1 V, f) +0.2 V, g) +0.3 V, h) +0.4 V

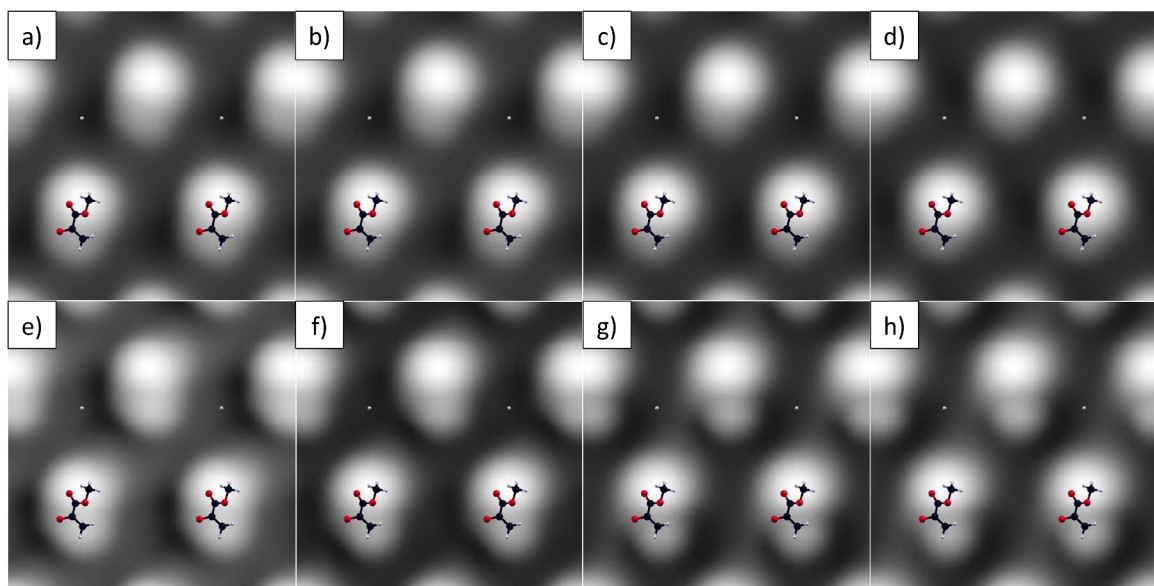

Figure S17: Simulated STM images of the most stable enolate form of methyl pyruvate (BA *cis*) imaged with a CH<sub>3</sub> group on Au on W(111) tip at varied bias: a) -0.1 V, b) -0.2 V, c) -0.3 V, d) -0.4 V e) +0.1 V, f) +0.2 V, g) +0.3 V, h) +0.4 V

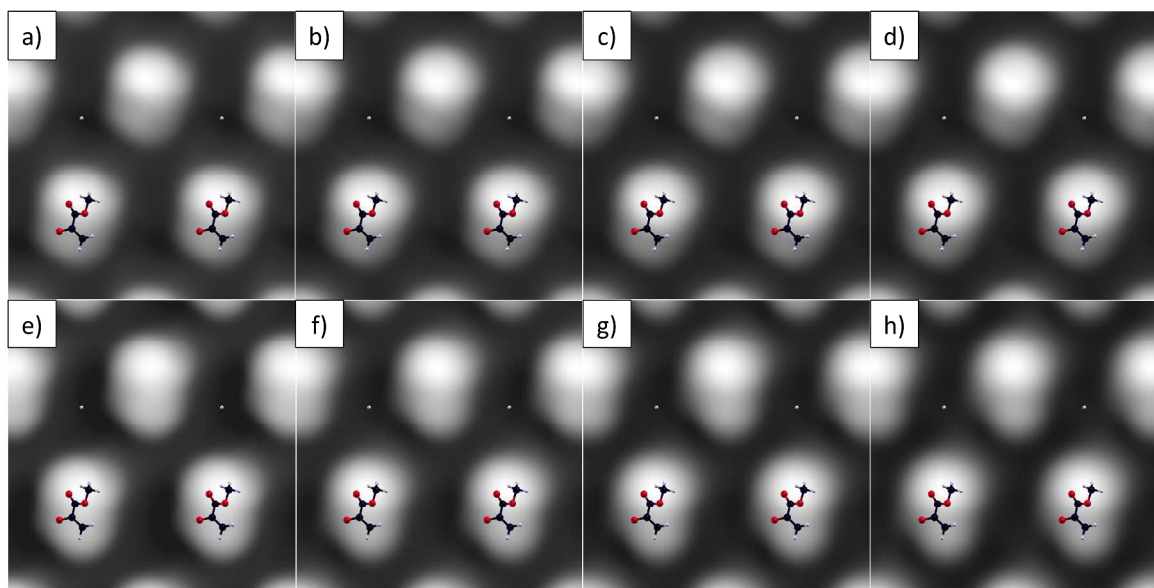

Figure S18: Simulated STM images of the most stable enolate form of methyl pyruvate (BA *cis*) imaged with a CO group on Au on W(111) tip at varied bias: a) -0.1 V, b) -0.2 V, c) -0.3 V, d) -0.4 V e) +0.1 V, f) +0.2 V, g) +0.3 V, h) +0.4 V

File: Atom coordinates for the most stable enol form of methyl pyruvate depicted in Fig. 7 of the manuscript (MP\_enol\_cis\_AB.xyz)
